# Supplementary material for: Specific and sensitive, ready-to-use universal fungi detection by visual color using ITS1 loop-mediated isothermal amplification combined hydroxynaphthol blue
Source: PeerJ. 2021 Mar 18;9:e11082. doi: 10.7717/peerj.11082 (PMC7982077; doi:10.7717/peerj.11082)
Supplement: Supplemental Information 6 [file peerj-09-11082-s006.xlsx]

## Sheet: Fig.1B
nm	A. carbonarius	A. flavus	C. albicans	C. lunatus	R. mucilaginosa	R. oligosporus	U. esculenta	Human	Pig	Chicken	fish	S. pneumonia	P. mirabilis	S. aureus	Shigella sp.	Salmonella sp.	Corynebacterium sp.	B. cepacia	A.baumannii	K. pneumoniae	P. aeruginosa	Enterococcus sp.	S. epidermidis	S. saprophyticus	N. gonorrhoeae	C. trachomatis	E. coli	S. typhimurium	ddH2O
400	0.079	0.311	0.286	0.084	0.095	-0.025	0.172	0.208	0.103	0.094	0.063	0.084	0.094	0.12	0.068	0.063	0.023	0.046	0.053	0.115	0.104	0.116	0.002	0.045	0.069	0.062	0.021	0.116	0.114
410	0.074	0.294	0.272	0.083	0.091	-0.023	0.166	0.196	0.1	0.09	0.06	0.083	0.092	0.125	0.071	0.066	0.025	0.049	0.058	0.114	0.108	0.116	0.006	0.047	0.07	0.066	0.011	0.12	0.115
420	0.073	0.279	0.257	0.074	0.083	-0.028	0.159	0.178	0.086	0.077	0.048	0.068	0.078	0.112	0.06	0.054	0.015	0.039	0.051	0.104	0.096	0.103	0.004	0.034	0.057	0.055	0.02	0.101	0.098
430	0.081	0.269	0.246	0.08	0.087	-0.019	0.154	0.175	0.087	0.08	0.052	0.071	0.08	0.114	0.065	0.057	0.019	0.042	0.053	0.108	0.095	0.106	0	0.036	0.061	0.061	0.016	0.099	0.098
440	0.072	0.253	0.233	0.073	0.082	-0.016	0.154	0.174	0.087	0.078	0.056	0.072	0.08	0.117	0.064	0.059	0.019	0.043	0.055	0.108	0.098	0.104	0.005	0.039	0.064	0.059	0.019	0.099	0.097
450	0.082	0.244	0.228	0.076	0.084	-0.007	0.139	0.179	0.093	0.086	0.061	0.081	0.087	0.118	0.071	0.065	0.03	0.051	0.06	0.112	0.103	0.11	0.013	0.047	0.066	0.065	0.008	0.105	0.101
460	0.079	0.233	0.214	0.067	0.076	-0.013	0.135	0.168	0.08	0.071	0.05	0.067	0.075	0.108	0.057	0.054	0.022	0.043	0.049	0.103	0.093	0.101	0.008	0.039	0.06	0.053	0.018	0.095	0.092
470	0.068	0.23	0.21	0.068	0.074	-0.004	0.135	0.172	0.085	0.071	0.054	0.072	0.077	0.107	0.059	0.055	0.027	0.048	0.053	0.105	0.09	0.101	0.018	0.046	0.066	0.061	0.023	0.095	0.096
480	0.065	0.223	0.205	0.067	0.076	0.005	0.151	0.178	0.087	0.076	0.061	0.075	0.081	0.103	0.063	0.056	0.032	0.05	0.054	0.109	0.098	0.105	0.025	0.05	0.067	0.062	0.031	0.094	0.095
490	0.074	0.214	0.193	0.071	0.078	0.02	0.154	0.178	0.087	0.077	0.062	0.078	0.081	0.098	0.058	0.054	0.038	0.049	0.053	0.107	0.091	0.101	0.027	0.051	0.067	0.062	0.048	0.093	0.091
500	0.048	0.211	0.184	0.068	0.072	0.021	0.143	0.184	0.092	0.081	0.072	0.085	0.084	0.095	0.063	0.058	0.046	0.056	0.055	0.108	0.095	0.105	0.043	0.061	0.079	0.064	0.047	0.097	0.096
510	0.053	0.205	0.182	0.065	0.071	0.031	0.145	0.192	0.091	0.078	0.072	0.088	0.089	0.086	0.06	0.056	0.047	0.056	0.052	0.104	0.097	0.102	0.046	0.064	0.074	0.067	0.063	0.095	0.096
520	0.053	0.205	0.184	0.075	0.078	0.046	0.154	0.216	0.106	0.089	0.083	0.096	0.096	0.09	0.065	0.06	0.061	0.064	0.055	0.116	0.104	0.112	0.064	0.075	0.085	0.077	0.065	0.108	0.106
530	0.052	0.197	0.176	0.078	0.083	0.061	0.154	0.217	0.112	0.097	0.088	0.104	0.104	0.085	0.067	0.064	0.065	0.074	0.06	0.117	0.105	0.111	0.072	0.082	0.087	0.074	0.081	0.105	0.106
540	0.045	0.206	0.186	0.081	0.083	0.062	0.17	0.221	0.111	0.095	0.089	0.104	0.099	0.084	0.068	0.062	0.069	0.073	0.063	0.119	0.112	0.113	0.075	0.086	0.091	0.077	0.076	0.106	0.105
550	0.019	0.192	0.169	0.071	0.071	0.069	0.165	0.222	0.109	0.092	0.087	0.1	0.098	0.069	0.064	0.059	0.071	0.07	0.051	0.107	0.102	0.107	0.084	0.088	0.091	0.075	0.08	0.104	0.104
560	0.021	0.189	0.168	0.07	0.074	0.076	0.163	0.224	0.106	0.089	0.088	0.098	0.095	0.064	0.065	0.061	0.073	0.075	0.057	0.107	0.104	0.108	0.087	0.091	0.094	0.08	0.075	0.106	0.106
570	0.007	0.182	0.168	0.069	0.073	0.085	0.166	0.217	0.104	0.089	0.087	0.095	0.091	0.062	0.057	0.059	0.068	0.071	0.048	0.098	0.095	0.098	0.083	0.088	0.088	0.077	0.09	0.097	0.099
580	0.011	0.183	0.165	0.069	0.075	0.092	0.159	0.208	0.102	0.087	0.079	0.092	0.09	0.064	0.062	0.062	0.072	0.072	0.049	0.088	0.093	0.099	0.077	0.083	0.085	0.068	0.079	0.093	0.097
590	0.01	0.18	0.158	0.061	0.062	0.081	0.157	0.177	0.079	0.067	0.054	0.07	0.072	0.042	0.045	0.051	0.05	0.058	0.035	0.067	0.072	0.078	0.065	0.071	0.076	0.054	0.089	0.083	0.085
600	0.015	0.186	0.166	0.065	0.073	0.093	0.17	0.168	0.082	0.071	0.058	0.074	0.07	0.05	0.056	0.056	0.061	0.061	0.037	0.071	0.073	0.074	0.067	0.073	0.067	0.055	0.071	0.079	0.082
610	0.009	0.185	0.159	0.062	0.07	0.09	0.187	0.154	0.069	0.059	0.047	0.055	0.057	0.043	0.041	0.049	0.044	0.042	0.029	0.052	0.063	0.071	0.059	0.062	0.065	0.044	0.061	0.072	0.077
620	0.026	0.191	0.176	0.082	0.088	0.104	0.195	0.153	0.079	0.068	0.054	0.064	0.067	0.064	0.056	0.056	0.052	0.052	0.036	0.069	0.076	0.08	0.066	0.077	0.077	0.073	0.046	0.085	0.087
630	0.059	0.195	0.178	0.08	0.094	0.117	0.221	0.154	0.081	0.071	0.056	0.073	0.074	0.073	0.064	0.071	0.054	0.062	0.049	0.073	0.076	0.081	0.068	0.078	0.079	0.064	0.048	0.082	0.085
640	0.053	0.196	0.174	0.073	0.093	0.111	0.258	0.153	0.059	0.058	0.053	0.059	0.062	0.057	0.055	0.053	0.046	0.053	0.037	0.069	0.074	0.078	0.064	0.068	0.059	0.057	0.055	0.074	0.078
650	0.062	0.201	0.177	0.083	0.095	0.118	0.268	0.153	0.064	0.056	0.046	0.056	0.061	0.057	0.054	0.051	0.043	0.048	0.034	0.067	0.072	0.076	0.064	0.07	0.073	0.06	0.045	0.08	0.076
660	0.053	0.187	0.167	0.081	0.092	0.112	0.203	0.144	0.062	0.055	0.044	0.055	0.054	0.067	0.047	0.052	0.037	0.035	0.032	0.06	0.065	0.07	0.064	0.064	0.062	0.061	0.034	0.078	0.08
670	0.059	0.151	0.139	0.072	0.085	0.103	0.2	0.12	0.054	0.048	0.039	0.048	0.051	0.056	0.042	0.043	0.033	0.035	0.029	0.057	0.057	0.065	0.054	0.053	0.055	0.049	0.027	0.065	0.065
680	0.048	0.114	0.1	0.05	0.065	0.082	0.135	0.091	0.042	0.041	0.029	0.037	0.037	0.05	0.037	0.037	0.019	0.027	0.029	0.05	0.05	0.054	0.032	0.041	0.045	0.04	0.031	0.047	0.047
690	0.04	0.073	0.058	0.023	0.032	0.063	0.079	0.052	0.015	0.015	0.008	0.02	0.017	0.03	0.014	0.019	0.008	0.013	0.016	0.024	0.034	0.03	0.025	0.016	0.029	0.022	0.013	0.031	0.034
700	0	0.049	0.036	0.014	0.015	0.067	0.035	0.092	0.009	0.006	0.002	0.006	0.01	0.018	0.007	0.01	0.005	0.012	0.01	0.022	0.026	0.026	0.01	0.013	0.022	0.01	0.02	0.028	0.028

## Sheet: Fig.3B
nm	4.6 pg (9.6E6 copy)	0.46 pg (9.6E5 copy)	46 fg (9.6E4 copy)	4.6 fg (9.6E3 copy)	0.46 fg (960 copy)	46 ag (96 copy)	4.6 ag (9.6 copy)	0.46 ag (0.96 copy)
400	0.079	0.038	0.072	0.064	0.053	0.067	0.116	0.013
410	0.071	0.036	0.068	0.056	0.047	0.061	0.111	0.013
420	0.064	0.034	0.062	0.05	0.045	0.057	0.107	0.012
430	0.065	0.034	0.061	0.048	0.045	0.053	0.101	0.009
440	0.066	0.035	0.061	0.044	0.045	0.053	0.102	0.013
450	0.063	0.039	0.063	0.05	0.047	0.06	0.101	0.025
460	0.064	0.036	0.06	0.047	0.045	0.058	0.106	0.027
470	0.065	0.039	0.063	0.05	0.046	0.06	0.111	0.032
480	0.068	0.038	0.062	0.052	0.049	0.059	0.11	0.035
490	0.076	0.043	0.066	0.056	0.052	0.063	0.112	0.04
500	0.083	0.047	0.072	0.064	0.06	0.069	0.116	0.046
510	0.09	0.053	0.077	0.07	0.062	0.077	0.123	0.056
520	0.104	0.064	0.089	0.084	0.074	0.089	0.133	0.071
530	0.108	0.069	0.089	0.089	0.077	0.097	0.135	0.081
540	0.112	0.068	0.089	0.093	0.075	0.096	0.14	0.076
550	0.118	0.069	0.091	0.099	0.078	0.102	0.14	0.078
560	0.124	0.076	0.094	0.102	0.085	0.106	0.14	0.084
570	0.122	0.069	0.091	0.109	0.079	0.109	0.139	0.068
580	0.124	0.077	0.09	0.114	0.085	0.11	0.142	0.07
590	0.122	0.075	0.086	0.099	0.073	0.103	0.134	0.061
600	0.126	0.074	0.085	0.106	0.071	0.1	0.131	0.049
610	0.13	0.078	0.087	0.115	0.076	0.11	0.137	0.049
620	0.138	0.078	0.089	0.111	0.079	0.105	0.138	0.035
630	0.136	0.09	0.093	0.122	0.085	0.119	0.145	0.051
640	0.141	0.09	0.095	0.123	0.084	0.119	0.146	0.05
650	0.155	0.093	0.1	0.123	0.088	0.113	0.143	0.059
660	0.152	0.092	0.101	0.128	0.09	0.121	0.142	0.048
670	0.123	0.07	0.081	0.091	0.066	0.094	0.132	0.033
680	0.08	0.047	0.054	0.057	0.041	0.059	0.09	0.015
690	0.04	0.014	0.023	0.014	0.011	0.019	0.055	-0.009
700	0.022	0.009	0.011	0.001	0.006	0.009	0.051	-0.003

## Sheet: Fig.3D
	Wavelength	9.6E6 copy	9.6E5 copy	9.6E4 copy	9.6E3 copy	960 copy	96 copy	9.6 copy	0.96 copy
Rep 1	650	0.162	0.162	0.231	0.192	0.096	0.157	0.134	0.122
	580	0.126	0.134	0.193	0.175	0.091	0.154	0.133	0.128
	650/580	1.28571	1.20896	1.19689	1.09714	1.05495	1.01948	1.00752	0.953125
Rep2	650	0.37	0.289	0.236	0.167	0.155	0.179	0.177	0.124
	580	0.301	0.228	0.207	0.143	0.143	0.173	0.179	0.136
	650/580	1.22924	1.26754	1.1401	1.16783	1.08392	1.03468	0.988827	0.911765
Rep3	650	0.155	0.093	0.1	0.123	0.088	0.113	0.143	0.059
	580	0.124	0.077	0.09	0.114	0.085	0.11	0.142	0.07
	650/580	1.25	1.20779	1.11111	1.07895	1.03529	1.02727	1.00704	0.842857

## Sheet: Fig.5
		30C				50C				80C
Days		19	22	30	35	13	15	18	20	6	7	8	9
3%glycerol	Rep 1	98.8936	87.0073	56.7854	51.6764	103.064	46.6936	49.2942	38.7465	93.14	70.4762	89.7705	66.44
	Rep 2	87.8609	83.1754	60.3318	52.3864	98.7432	49.8226	48.6019	36.9355	101.059	73.8686	72.0086	83.8467
	Rep 3	100.03	87.1773	61.49	49.1918	90.5426	43.8406	51.4142	37.369	101.109	91.2743	68.299	78.4695
	average	95.5948	85.7867	59.5358	51.0848	97.4501	46.7856	49.7701	37.6837	98.4359	78.5397	76.6927	76.2521
	SD	5.48836	1.84771	2.00141	1.3696	5.19318	2.44298	1.1964	0.772073	3.7448	9.11061	9.37057	7.27717
5%glycerol	Rep 1	103.728	88	62.3443	50.3478	100.812	68.9031	59.0108	52.6085	93.2827	85.4545	82.6364	83.5327
	Rep 2	103.199	84.227	56.9444	48.7574	101.905	74.7615	64.6408	59.6215	93.3836	87.3909	83.6891	87.0591
	Rep 3	84.9183	77.3043	66.5504	48.3226	87.4854	70.75	68.5161	60.0323	109.147	81.8991	85.7609	81.4936
	average	97.2817	83.1771	61.9464	49.1426	96.7341	71.4715	64.0559	57.4208	98.6046	84.9149	84.0288	84.0285
	SD	8.74495	4.42914	3.93175	0.870507	6.55501	2.44552	3.90253	3.40695	7.45496	2.27427	1.29801	2.29897
3%PVA	Rep 1	99.0096	84.5287	67.7791	58.4783	100.194	54.6642	42.4167	35.0446	101.463	95.8056	84.3752	42.8704
	Rep 2	96.5548	77.6809	67.8409	59.3478	97.1819	66.194	41.0446	34.733	96.7448	91.9472	89.456	56.4496
	Rep 3	95.373	83.7226	71.087	60.1765	100.87	56.7967	45.3898	38.5307	96.5776	92.9776	80.988	41.3712
	average	96.9791	81.9774	68.9023	59.3342	99.4152	59.2183	42.9504	36.1028	98.2619	93.5768	84.9397	46.8971
	SD	1.51463	3.05587	1.54498	0.693379	1.60314	5.00878	1.81358	1.7215	2.26471	1.63117	3.48002	6.78233
5%PVA	Rep 1	105.271	80.4635	39.3043	52.7017	93.8095	89.0819	86.0314	67.3657	95.967	95.821	86.458	82.833
	Rep 2	84.6244	79.167	45.3765	59.5896	92.9952	94.0238	88.0952	75.4886	83.5	90.545	84.047	80.231
	Rep 3	99.7061	83.8635	48.733	58.0704	106.749	93.9086	71.7181	73.7143	106.083	87.912	84.544	81.329
	average	96.5339	81.1646	44.4713	56.7872	97.8514	92.3381	81.9483	72.1895	95.1833	91.426	85.0163	81.4643
	SD	8.72243	1.98041	3.9021	2.95471	6.30067	2.30296	7.28272	3.48701	9.23611	3.28838	1.03941	1.06656

## Sheet: Suppl.Fig.1
F3	G	A	T	T	G	A	A	T	G	G	C	T	C	A	G	T	G	A
a	0	88.85	0	0	0.17	76.71	88.69	0	0	0	0.17	0.17	1	67.22	0	0	0	82.86
t	0.17	0	88.69	87.85	0	0	0	88.85	0	0	0.33	88.02	57.4	0	0.17	83.69	0	0.17
c	0	0	0.33	1	0	0	0	0	0	0	88.02	0	25.96	0.17	0	0	0	0
g	88.69	0	0	0.17	77.37	12.48	0.5	0	88.85	88.85	0.17	0.17	0	16.64	83.19	0	83.69	0.67
F2	C	G	G	A	A	A	G	T	T	C	G	T	C	A	A	A	C
a	1.5	3.66	50.25	35.94	78.87	77.87	5.49	0.33	0.5	2.16	8.15	5.16	0.67	74.21	77.2	76.87	0.17
t	37.94	2	0.17	0	0.17	0.67	1.33	58.9	75.04	1.66	11.15	69.38	0	0.33	0.17	0	0.83
c	39.27	0.33	0.83	0.17	0.17	0	2.16	19.47	2.16	4.99	1.83	2.16	76.87	0.17	0	0.17	75.71
g	2	74.71	29.12	44.26	0.33	0.67	68.39	0.17	0.67	69.38	56.74	1.5	0.33	2.83	0	0.17	0
LF	C	G	T	A	A	C	A	A	G	G	T	T	T	C	C	G	T
a	0.17	0.17	0	63.89	66.56	3.49	63.73	66.22	3.16	0.33	0	0.83	0.5	0	0	0	0
t	4.16	0	63.23	3.33	0.33	0	0.17	0.17	0	0	62.73	45.76	62.4	2.5	0	0	60.4
c	63.56	3.66	0.17	0	0.17	63.73	3.16	0	0.17	0.17	0.33	17.64	0	60.07	62.23	1.66	0.17
g	0	63.39	3.83	0	0.17	0	0	0.17	63.06	65.39	2.66	0.17	0.5	0.17	0	60.4	1.33
F1	G	T	A	G	G	T	G	A	A	C	C	T	G	C	G	G	A
a	0	0	60.23	1.33	0.17	0.17	0	56.91	57.74	1.16	0	0	0	0	0.67	0	54.58
t	0	60.4	1.33	0.17	0.17	58.24	0.67	0.17	0	0.17	0	56.24	1.33	0	0	0	0.17
c	1.66	0.17	0	0	0	0	0	0	0.17	56.91	57.57	1.5	0	56.41	1.16	0	0
g	60.4	1.33	0.33	58.9	58.9	1	58.24	0.5	0.17	0	0	0	56.24	1.16	55.41	56.91	1.16
B1	C	T	T	T	C	A	A	C	A	A	C	G	G	A	T	C	T	C	T	T	G
a	0	0	1.2	0.05	0.25	97.4	81.03	0	98.6	99.3	0	0	0	100	0	0.1	0.05	0	0.1	1	0.05
t	0.1	97.8	95.35	98.45	8.81	0	0.05	0.05	0.05	0	16.32	0	0	0	100	0.05	98.6	0.1	99.9	95.25	0.05
c	97.85	1.75	2.25	0.25	90.99	0	0	100	0	0.55	83.73	0.05	0	0	0.05	99.85	1.35	99.9	0.05	3.75	0
g	2.1	0	1.25	1.25	0	2.65	18.97	0	1.4	0.2	0	100	100	0.05	0	0.05	0.05	0	0	0.05	99.95
LB	C	T	C	G	C	A	T	C	G	A	T	G	A	A	G	A	A
a	0	0.05	0.3	1.5	2.3	97.9	0.35	0	0.2	99.9	0.05	0.6	99.95	99.9	0.3	99.55	96.45
t	2.65	89.59	1.9	0	2.2	0.8	99.3	0	0	0	99.85	0	0	0	0	0.05	0
c	97.3	9.05	66.88	3.2	95.45	0.65	0.3	100	0	0	0.1	0	0	0	0	0	1.25
g	0.05	1.3	30.92	95.3	0.05	0.15	0.05	0	99.8	0.1	0	99.4	0.05	0.1	99.7	0.4	2.3
B2	C	G	A	A	A	T	G	C	G	A	T	A	A	G	T	A	A	T	G	T
a	0	5.85	100	99.85	67.03	2.25	0.15	0	0.1	100	0.75	99.95	90.35	0.1	0	98.65	86.09	0.05	0.9	0.05
t	0.95	0	0	0	9.35	95.45	0	2.1	0	0	99	0	4.25	2.3	99.95	0.05	2.45	99.8	0.1	96.35
c	99.05	0	0	0.05	0.65	2.3	0	97.9	0	0	0.25	0	5.1	4.85	0.05	0	0	0.15	0	3.6
g	0	94.15	0	0.1	0	0	99.85	0	99.9	0	0	0.05	0.3	92.75	0	1.3	11.46	0	99	0
B3	A	A	T	C	T	T	T	G	A	A	C	G	C	A	C	C	T	T
a	99.65	89.24	0	0.05	0.05	0.05	0.05	0.05	99.6	99.65	0	0.35	0	99.5	7.8	56.33	0.1	0
t	0.05	0.05	95.3	3.95	96.1	99.85	98.7	0	0	0	0.1	0.25	0.1	0	21.76	0.15	99.6	99.4
c	0.25	0.05	4.65	95.9	2.35	0.1	1.25	0	0.25	0.1	99.9	0.05	99.9	0.4	68.38	42.02	0.3	0.1
g	0.05	10.66	0	0.1	1.25	0	0	99.95	0.15	0.25	0	99.35	0	0.1	0.55	0	0	0.5
